# Supplementary material
Source: PubMed Central journal article supplement (PMC4018952)

# **Supplemental Figures 1A-1B**

***Components of the Nutrient Adequacy  
Score (NAS) as % adequate per nutrient,  
overall and by sex***

# 1A. Men

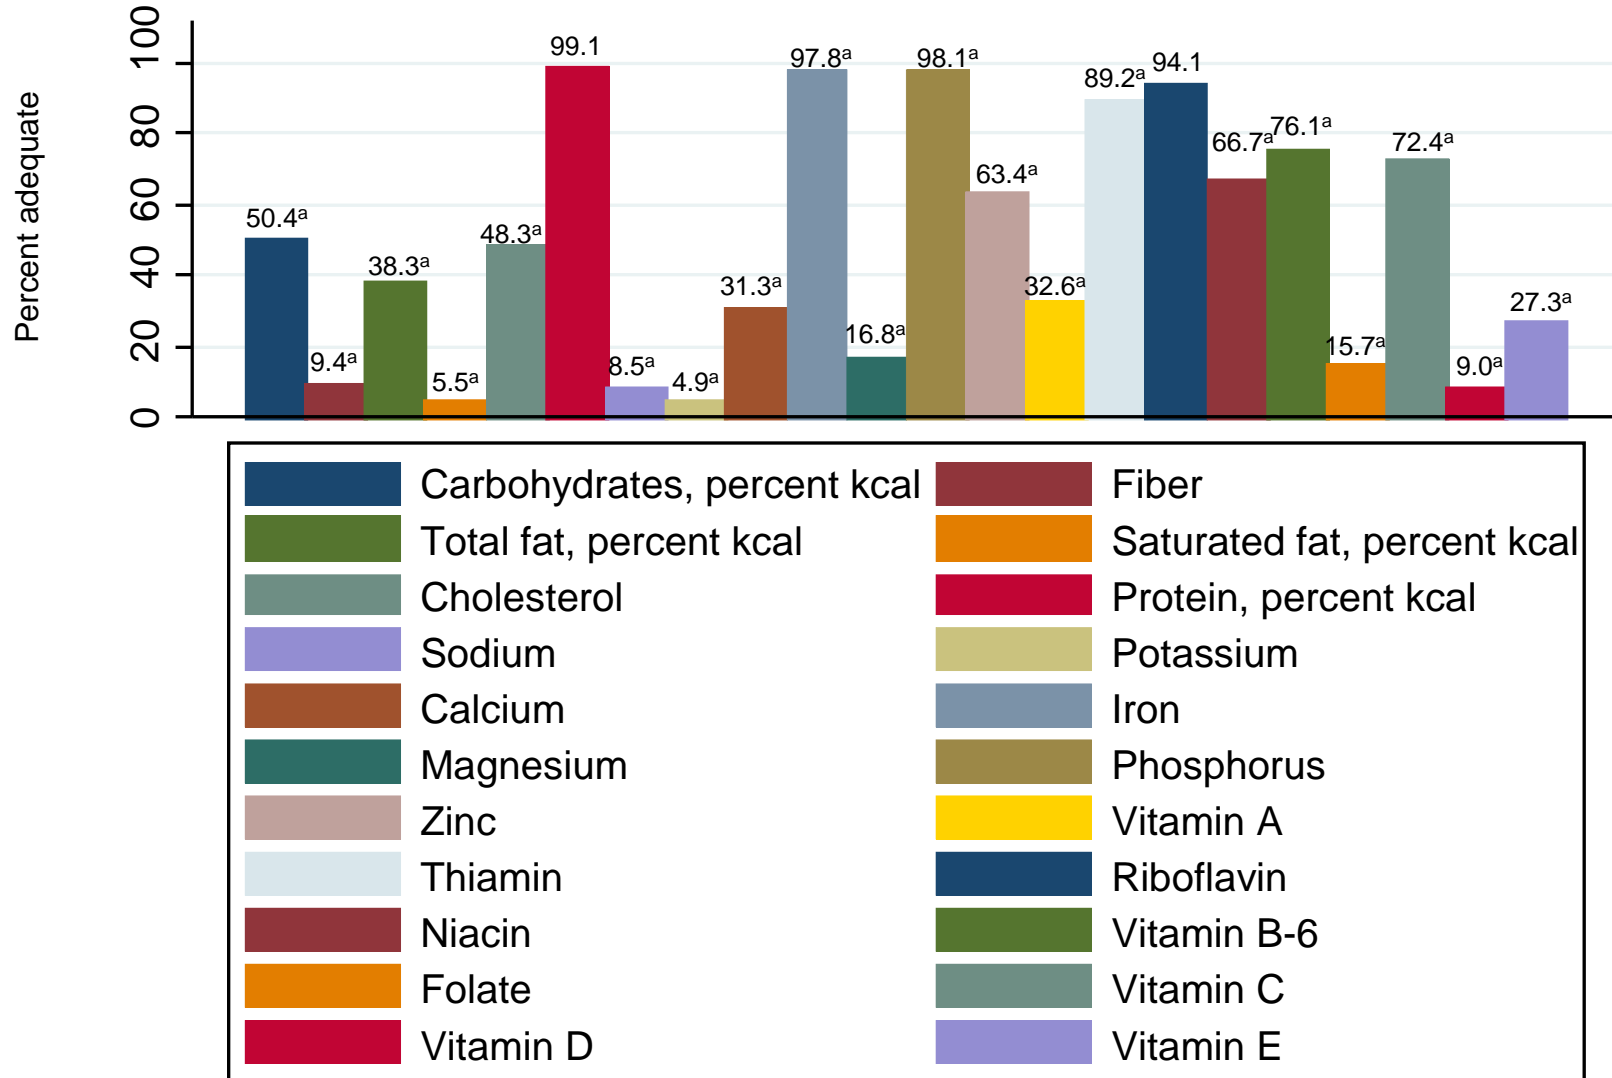

# 1B. Women

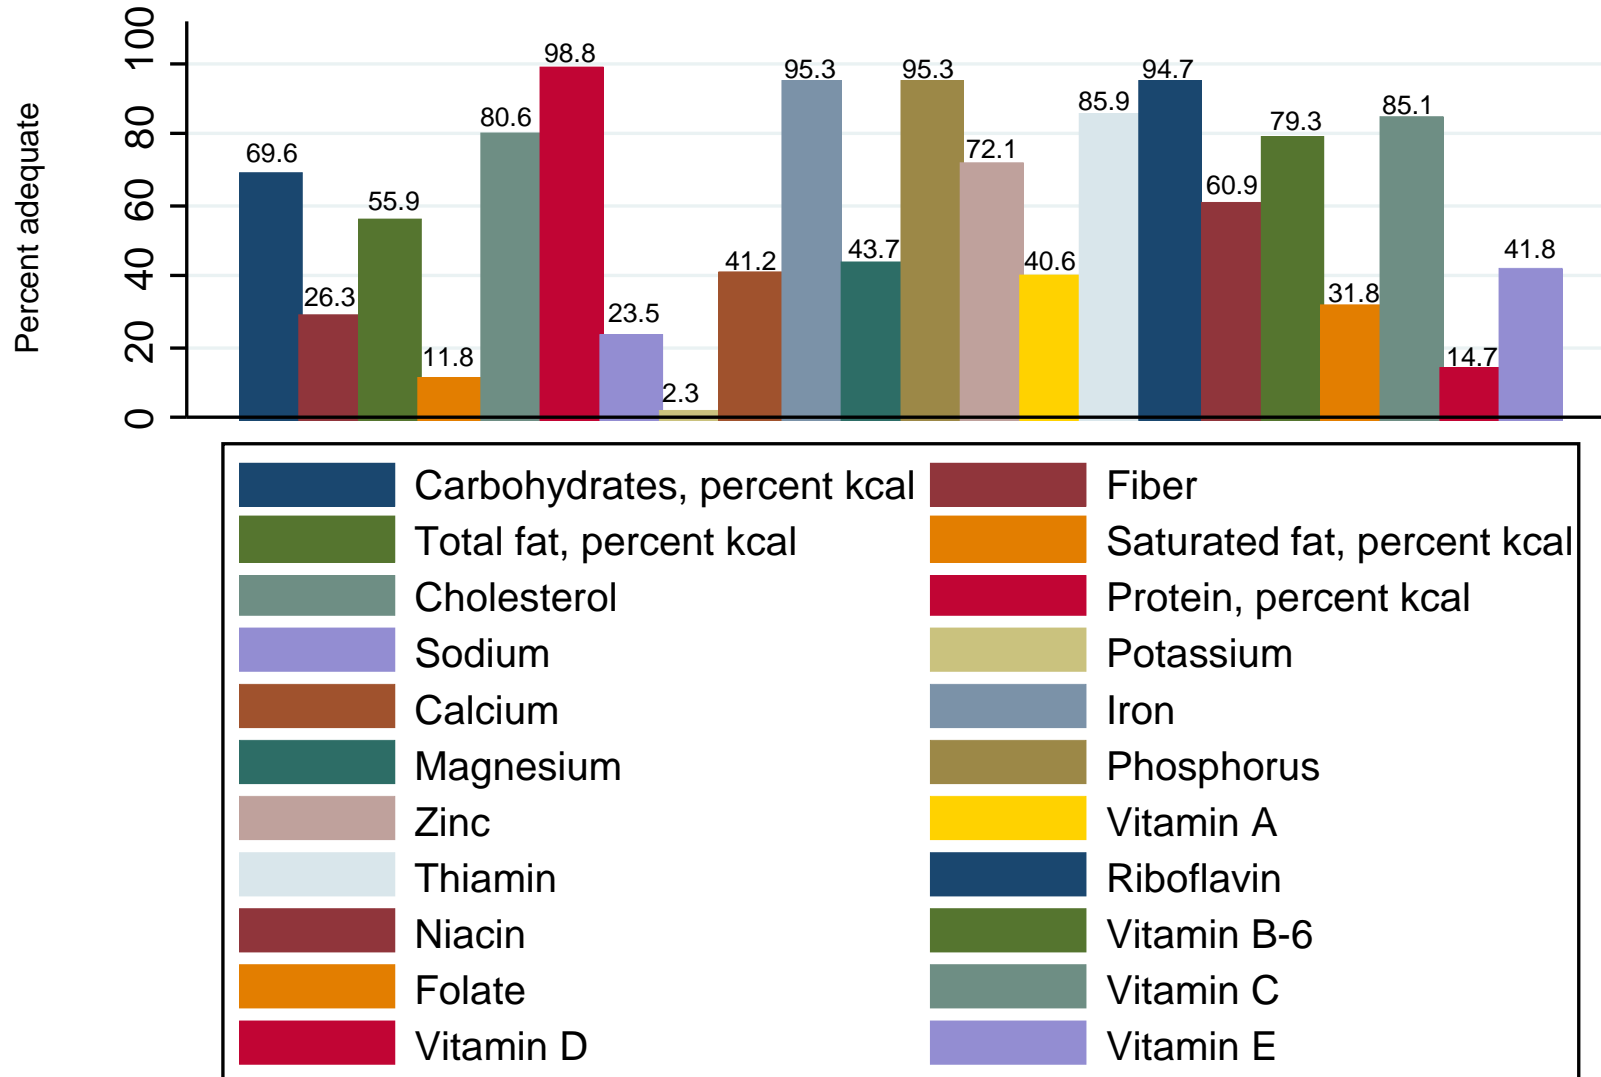

Supplement: jn.113.189027_nutrition189027SupplementaryData1.pdf [file jn.113.189027_nutrition189027SupplementaryData1.pdf]
