# Supplementary material
Source: PubMed Central journal article supplement (PMC4018952)
Supplement: jn.113.189027_nutrition189027SupplementaryData2.pdf [file jn.113.189027_nutrition189027SupplementaryData2.pdf]

# **Supplemental Figures 2A-2J**

***Predicted trajectories of cognitive performance by levels of dietary exposure, stratifying by baseline age (50y vs. 70y): hypothetical population with fixed covariates: Interval model***

## 2A. MMSE, total score

Baseline age=50y

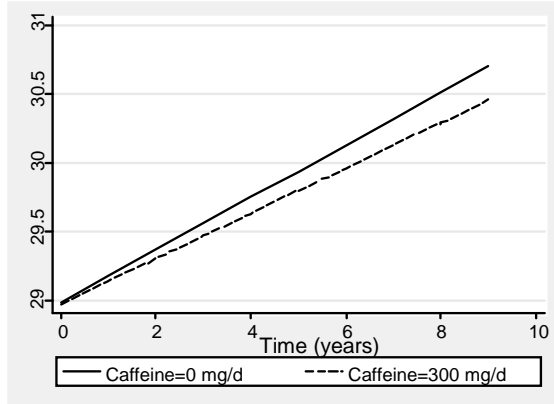

$\gamma_{00} > 0$ ; **p < 0.001**  
 $\gamma_{10} > 0$ ; p=0.097  
 Age > 0; p=0.98  
 Age × Time < 0; p=0.087  
 $\gamma_{01} < 0$ ; p=0.92  
 $\gamma_{11} < 0$ ; p=0.38

Baseline age=70y

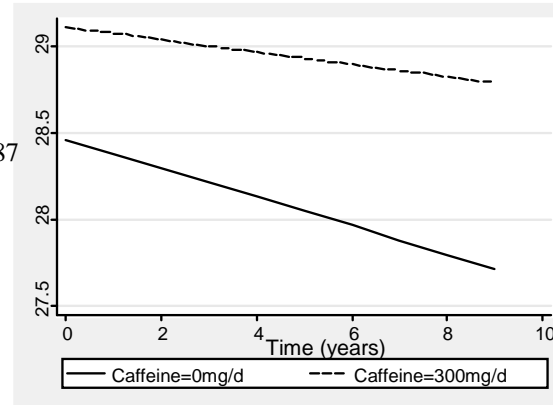

$\gamma_{00} > 0$ ; **p < 0.001**  
 $\gamma_{10} > 0$ ; p=0.89  
**Age < 0**; **p = 0.001**  
 Age × Time < 0; p=0.53  
 $\gamma_{01} > 0$ ; **p = 0.008**  
 $\gamma_{11} > 0$ ; p=0.700

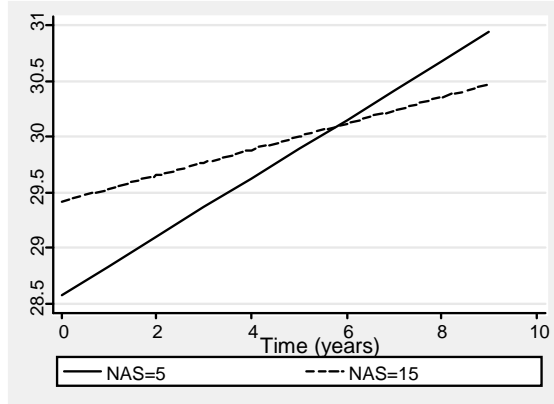

$\gamma_{02} > 0$ ; **p = 0.002**  
 $\gamma_{12} < 0$ ; p=0.017

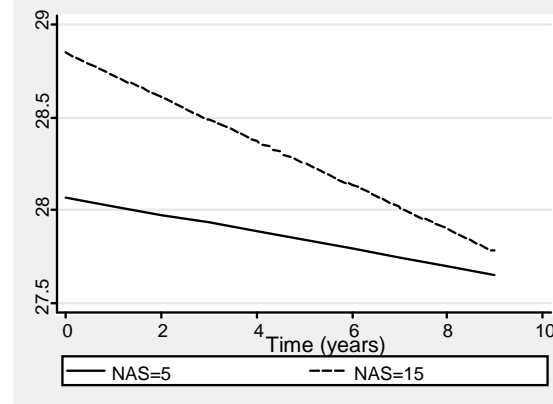

$\gamma_{02} > 0$ ; p=0.055  
 $\gamma_{12} < 0$ ; p=0.72

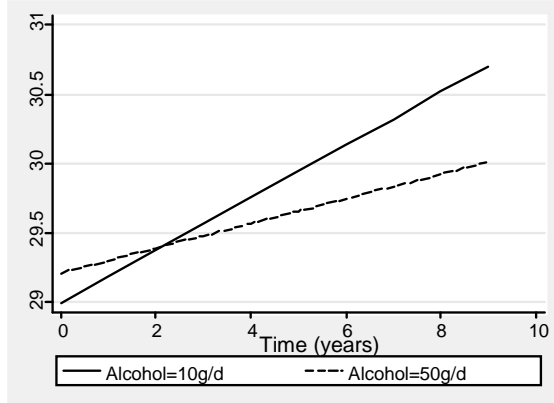

$\gamma_{03} > 0$ ; p=0.32  
 $\gamma_{13} < 0$ ; **p = 0.008**

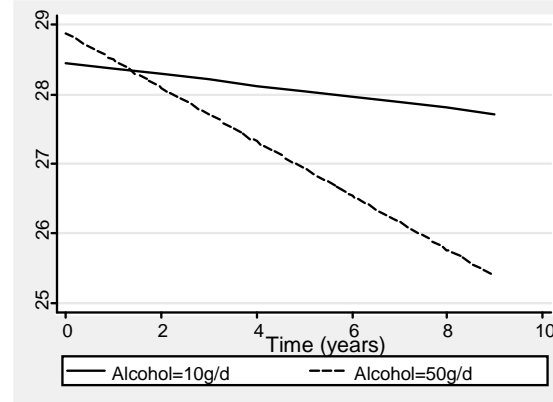

$\gamma_{03} > 0$ ; p=0.29  
 $\gamma_{13} < 0$ ; p=0.14

## 2B. CVLT, List A, Immediate free recall, total score

Baseline age=50y

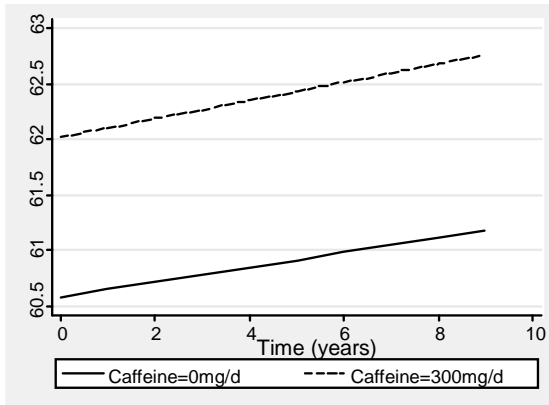

$\gamma_{00} > 0$ ;  $p < 0.001$   
 $\gamma_{10} > 0$ ;  $p = 0.70$   
**Age < 0**;  $p < 0.001$   
 Age  $\times$  Time < 0;  $p = 0.63$   
 $\gamma_{01} > 0$ ;  $p = 0.14$   
 $\gamma_{11} > 0$ ;  $p = 0.94$

Baseline age=70y

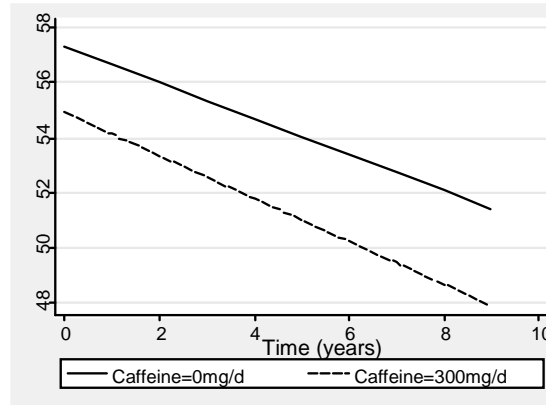

$\gamma_{00} > 0$ ;  $p < 0.001$   
 $\gamma_{10} < 0$ ;  $p = 0.53$   
**Age < 0**;  $p < 0.001$   
 Age  $\times$  Time > 0;  $p = 0.85$   
 $\gamma_{01} > 0$ ;  $p = 0.14$   
 $\gamma_{11} > 0$ ;  $p = 0.94$

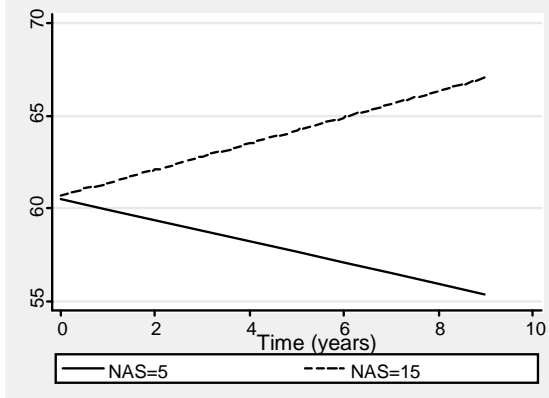

$\gamma_{02} > 0$ ;  $p = 0.92$   
 $\gamma_{12} > 0$ ;  $p = 0.019$

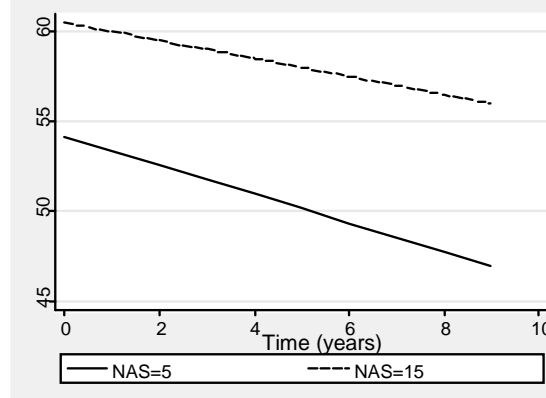

$\gamma_{02} > 0$ ;  $p = 0.015$   
 $\gamma_{12} > 0$ ;  $p = 0.65$

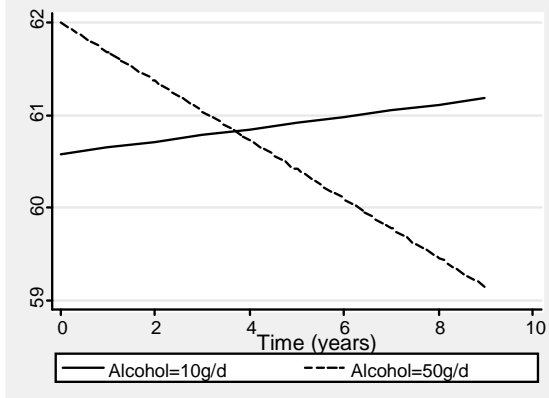

$\gamma_{03} > 0$ ;  $p = 0.31$   
 $\gamma_{13} < 0$ ;  $p = 0.22$

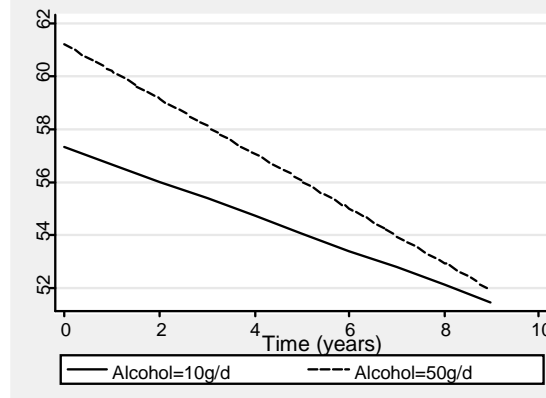

$\gamma_{03} > 0$ ;  $p = 0.11$   
 $\gamma_{13} < 0$ ;  $p = 0.56$

## 2C. CVLT, delayed free recall, total score

Baseline age=50y

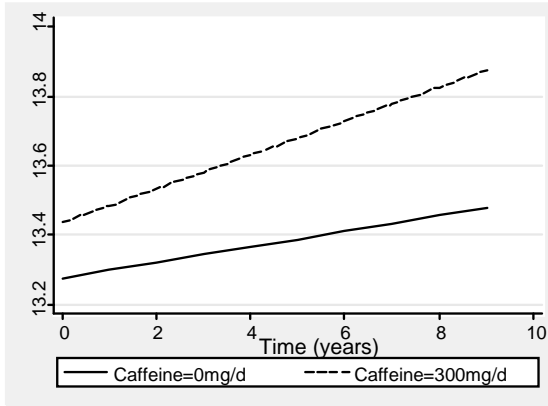

$\gamma_{00} > 0$ ;  $p < 0.001$   
 $\gamma_{10} > 0$ ;  $p = 0.68$   
**Age < 0**;  $p < 0.011$   
 $\text{Age} \times \text{Time} < 0$ ;  $p = 0.52$   
 $\gamma_{01} > 0$ ;  $p = 0.58$   
 $\gamma_{11} > 0$ ;  $p = 0.66$

Baseline age=70y

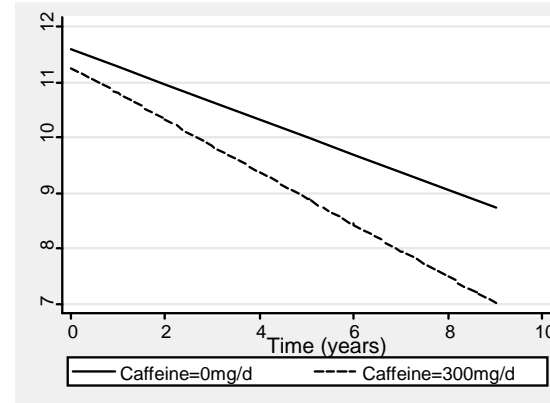

$\gamma_{00} > 0$ ;  $p < 0.001$   
 $\gamma_{10} < 0$ ;  $p = 0.29$   
**Age < 0**;  $p < 0.001$   
 $\text{Age} \times \text{Time} > 0$ ;  $p = 0.90$   
 $\gamma_{01} < 0$ ;  $p = 0.49$   
 $\gamma_{11} < 0$ ;  $p = 0.25$

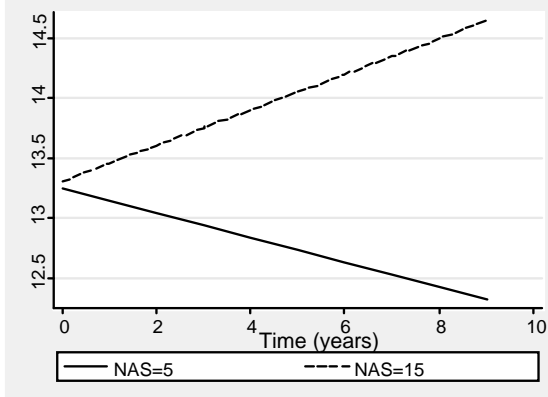

$\gamma_{02} > 0$ ;  $p = 0.92$   
 $\gamma_{12} > 0$ ;  $p = 0.077$

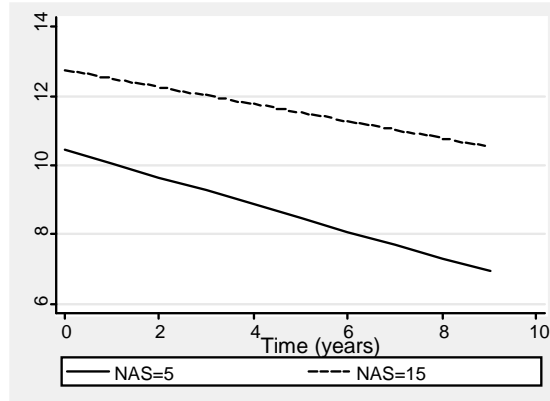

$\gamma_{02} > 0$ ;  $p = 0.006$   
 $\gamma_{12} > 0$ ;  $p = 0.49$

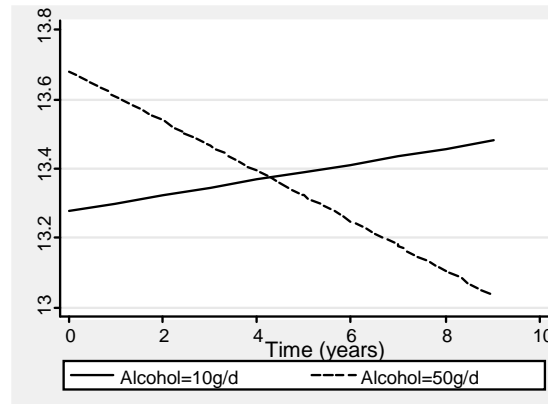

$\gamma_{03} > 0$ ;  $p = 0.34$   
 $\gamma_{13} < 0$ ;  $p = 0.24$

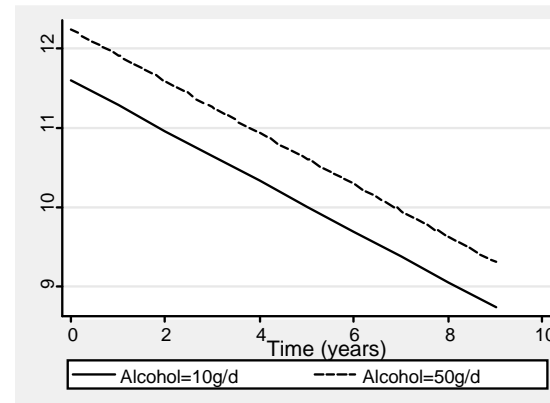

$\gamma_{03} > 0$ ;  $p = 0.41$   
 $\gamma_{13} < 0$ ;  $p = 0.97$

## 2D. BVRT, total errors

Baseline age=50y

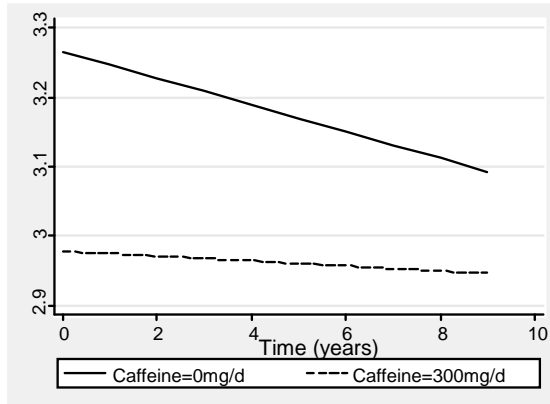

$\gamma_{00} > 0$ ;  $p < 0.001$   
 $\gamma_{10} > 0$ ;  $p = 0.96$   
**Age > 0**;  $p < 0.011$   
**Age × Time > 0**;  $p < 0.001$   
 $\gamma_{01} < 0$ ;  $p = 0.18$   
 $\gamma_{11} > 0$ ;  $p = 0.28$

Baseline age=70y

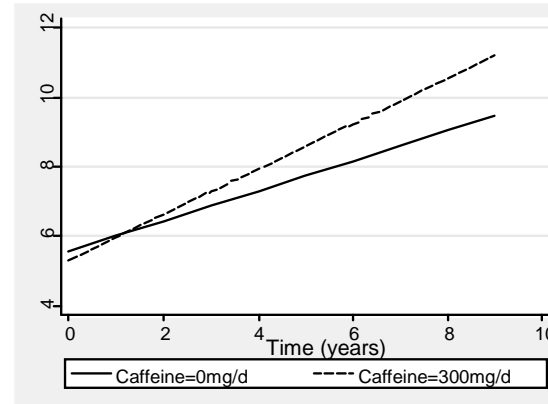

$\gamma_{00} > 0$ ;  $p < 0.001$   
 $\gamma_{10} > 0$ ;  $p = 0.068$   
**Age > 0**;  $p < 0.001$   
 Age × Time < 0;  $p = 0.292$   
 $\gamma_{01} < 0$ ;  $p = 0.61$   
 $\gamma_{11} > 0$ ;  $p = 0.12$

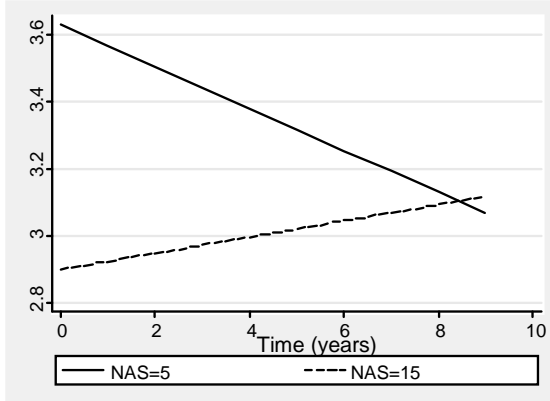

$\gamma_{02} < 0$ ;  $p = 0.060$   
 $\gamma_{12} > 0$ ;  $p = 0.044$

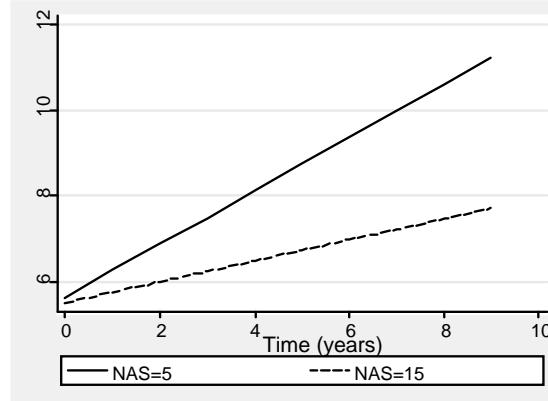

$\gamma_{02} < 0$ ;  $p = 0.87$   
 $\gamma_{12} < 0$ ;  $p = 0.075$

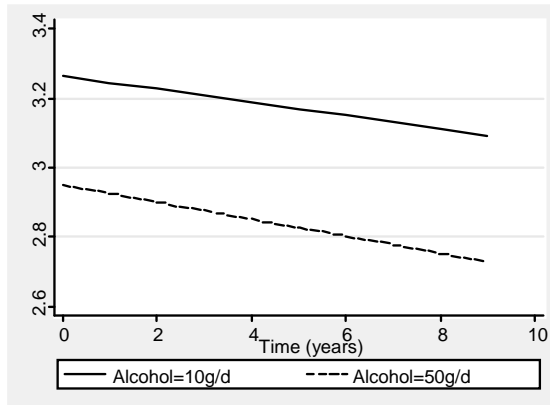

$\gamma_{02} < 0$ ;  $p = 0.23$   
 $\gamma_{12} < 0$ ;  $p = 0.62$

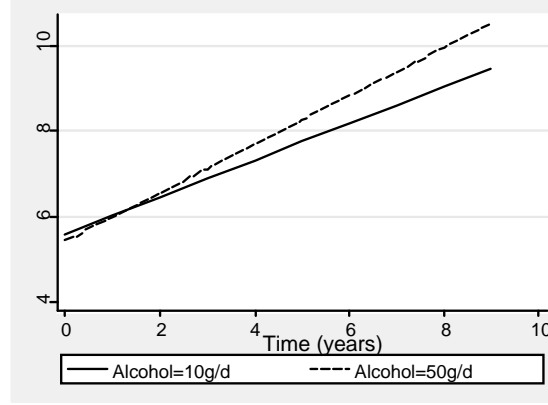

$\gamma_{03} < 0$ ;  $p = 0.81$   
 $\gamma_{13} > 0$ ;  $p = 0.53$

## 2E. VFT-C, total score

Baseline age=50y

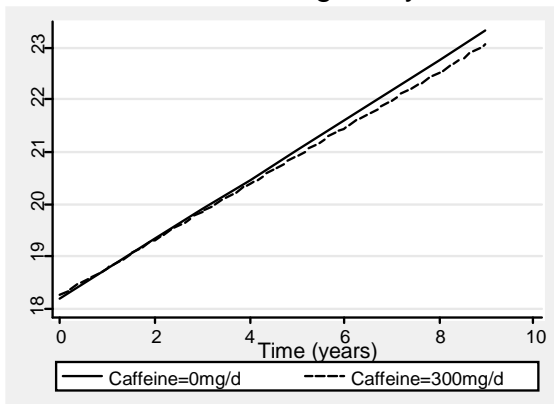

$\gamma_{00} > 0$ ;  $p < 0.001$   
 $\gamma_{10} > 0$ ;  $p = 0.003$   
 $\text{Age} < 0$ ;  $p < 0.011$   
 $\text{Age} \times \text{Time} < 0$ ;  $p < 0.001$   
 $\gamma_{01} > 0$ ;  $p = 0.85$   
 $\gamma_{11} < 0$ ;  $p = 0.46$

Baseline age=70y

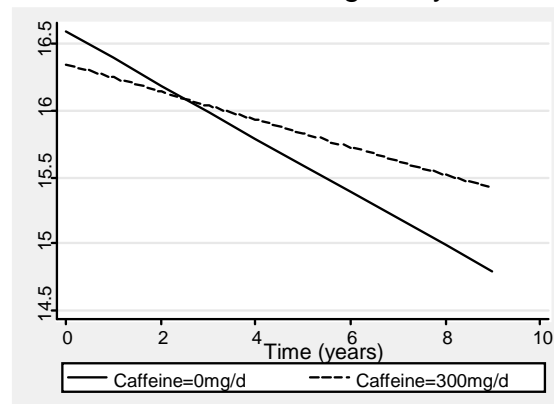

$\gamma_{00} > 0$ ;  $p < 0.001$   
 $\gamma_{10} > 0$ ;  $p = 0.52$   
 $\text{Age} < 0$ ;  $p < 0.001$   
 $\text{Age} \times \text{Time} < 0$ ;  $p < 0.027$   
 $\gamma_{01} < 0$ ;  $p = 0.55$   
 $\gamma_{11} > 0$ ;  $p = 0.21$

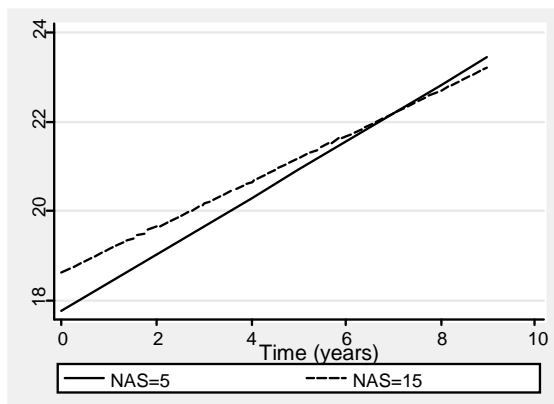

$\gamma_{02} > 0$ ;  $p = 0.19$   
 $\gamma_{12} < 0$ ;  $p = 0.26$

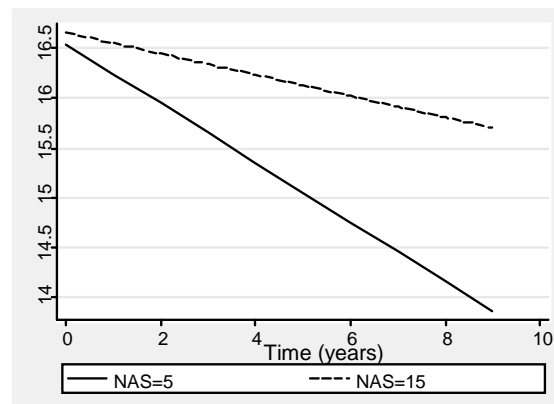

$\gamma_{02} > 0$ ;  $p = 0.86$   
 $\gamma_{12} > 0$ ;  $p = 0.14$

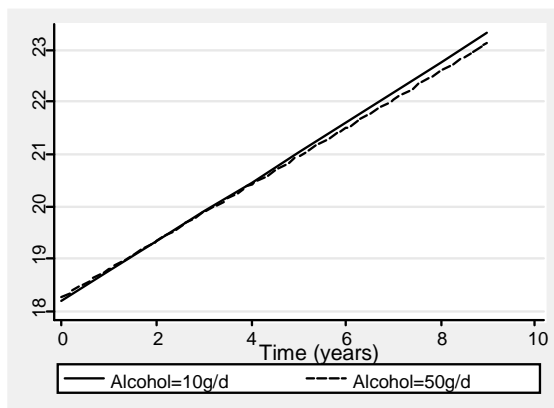

$\gamma_{03} > 0$ ;  $p = 0.89$   
 $\gamma_{13} < 0$ ;  $p = 0.66$

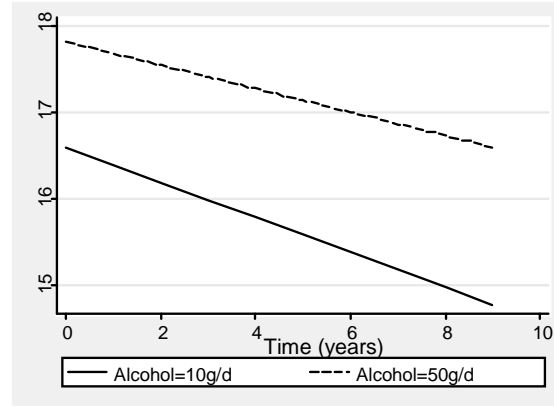

$\gamma_{03} > 0$ ;  $p = 0.06$   
 $\gamma_{13} > 0$ ;  $p = 0.63$

## 2F. VFT-L, total score

Baseline age=50y

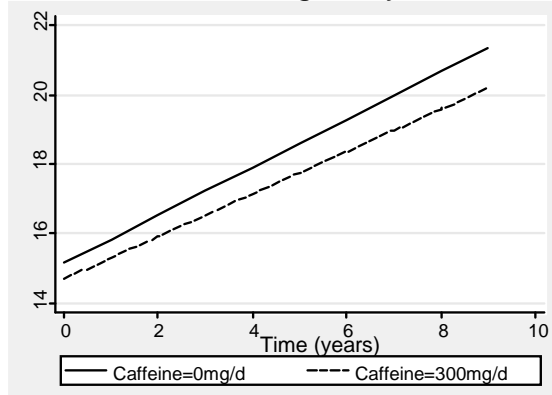

$\gamma_{00} > 0$ ;  $p < 0.001$   
 $\gamma_{10} > 0$ ;  $p = 0.001$   
 Age  $< 0$ ;  $p < 0.97$   
**Age  $\times$  Time  $< 0$ ;  $p < 0.001$**   
 $\gamma_{01} < 0$ ;  $p = 0.30$   
 $\gamma_{11} < 0$ ;  $p = 0.14$

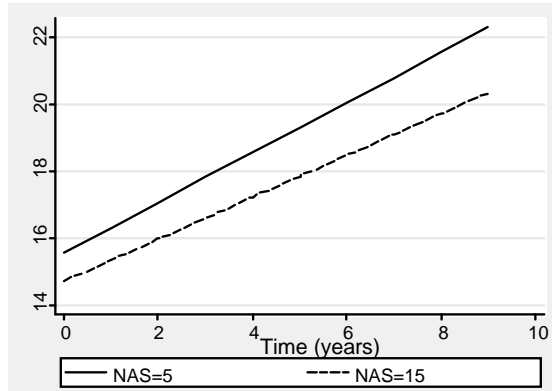

$\gamma_{02} < 0$ ;  $p = 0.30$   
 $\gamma_{12} < 0$ ;  $p = 0.27$

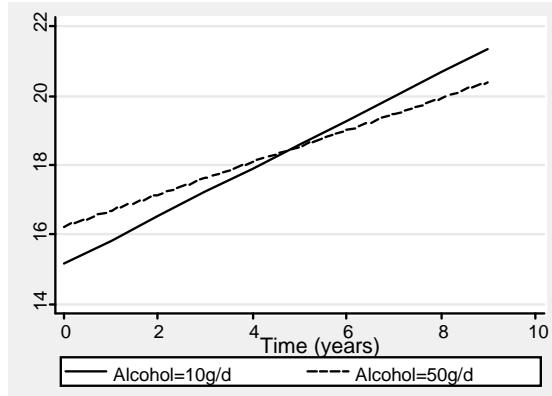

$\gamma_{03} > 0$ ;  $p = 0.096$   
 **$\gamma_{13} < 0$ ;  $p = 0.001$**

Baseline age=70y

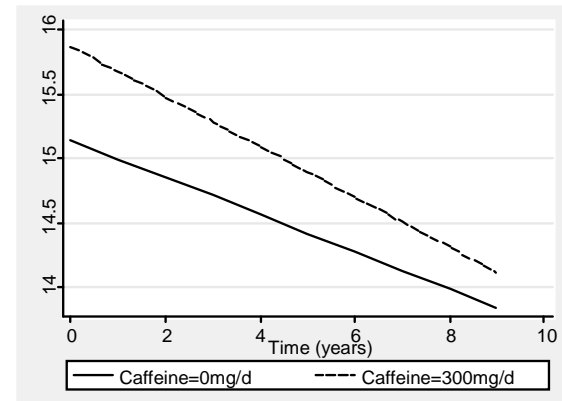

$\gamma_{00} > 0$ ;  $p < 0.001$   
 $\gamma_{10} > 0$ ;  $p = 0.66$   
**Age  $< 0$ ;  $p = 0.010$**   
 Age  $\times$  Time  $< 0$ ;  $p = 0.21$   
 $\gamma_{01} > 0$ ;  $p = 0.20$   
 $\gamma_{11} < 0$ ;  $p = 0.55$

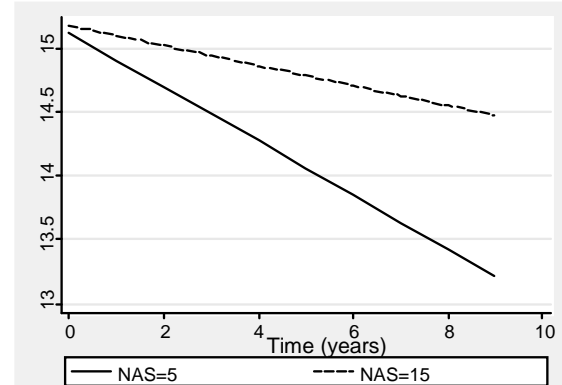

$\gamma_{02} < 0$ ;  $p = 0.95$   
 $\gamma_{12} < 0$ ;  $p = 0.33$

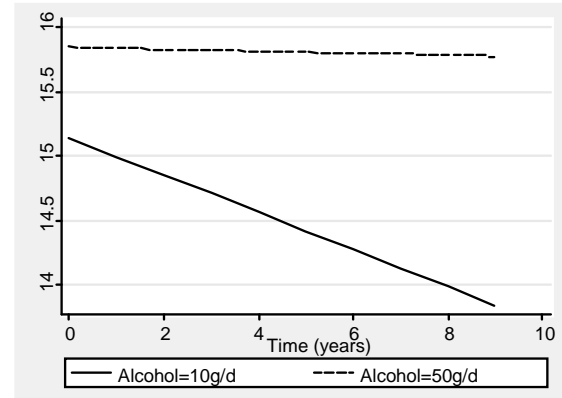

$\gamma_{03} > 0$ ;  $p = 0.42$   
 $\gamma_{13} > 0$ ;  $p = 0.35$

## 2G. TRAILS A, time(sec)

Baseline age=50y

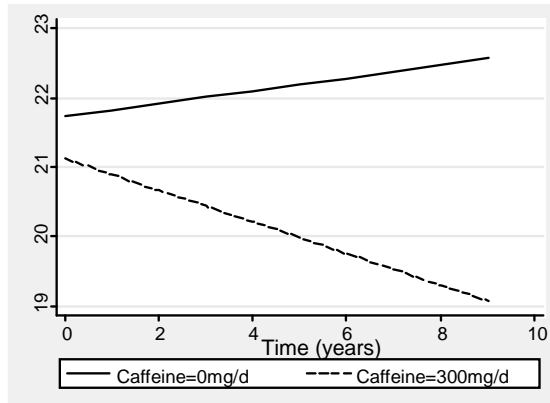

$\gamma_{00} > 0$ ;  $p < 0.001$   
 $\gamma_{10} > 0$ ;  $p = 0.93$   
**Age > 0**;  $p = 0.017$   
 Age  $\times$  Time < 0;  $p = 0.78$   
 $\gamma_{01} < 0$ ;  $p = 0.66$   
 $\gamma_{11} < 0$ ;  $p = 0.42$

Baseline age=70y

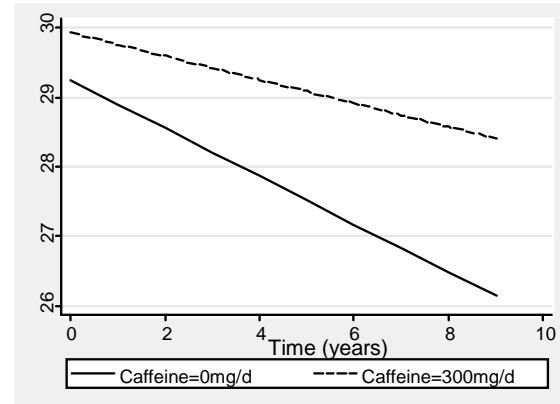

$\gamma_{00} > 0$ ;  $p = 0.074$   
 $\gamma_{10} < 0$ ;  $p = 0.72$   
**Age > 0**;  $p < 0.001$   
 Age  $\times$  Time > 0;  $p = 0.54$   
 $\gamma_{01} > 0$ ;  $p = 0.76$   
 $\gamma_{11} > 0$ ;  $p = 0.81$

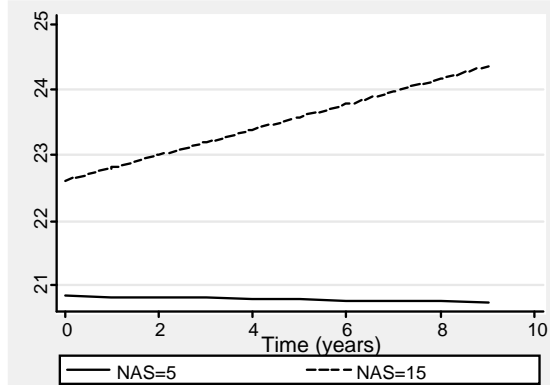

$\gamma_{02} > 0$ ;  $p = 0.52$   
 $\gamma_{12} > 0$ ;  $p = 0.80$

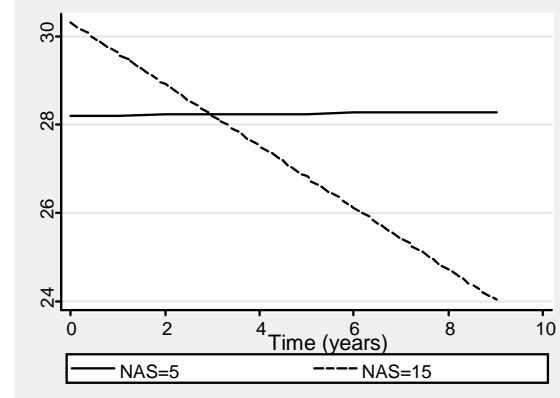

$\gamma_{02} > 0$ ;  $p = 0.57$   
 $\gamma_{12} < 0$ ;  $p = 0.56$

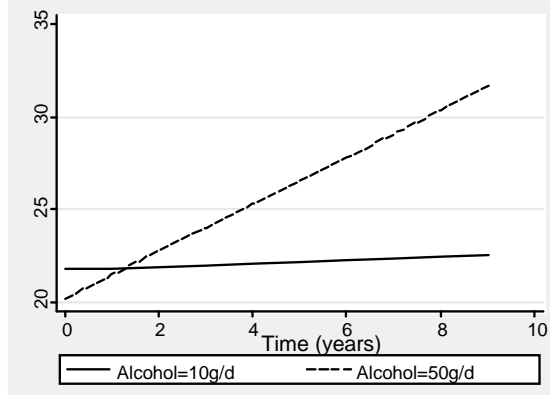

$\gamma_{03} > 0$ ;  $p = 0.49$   
 $\gamma_{13} > 0$ ;  $p = 0.06$

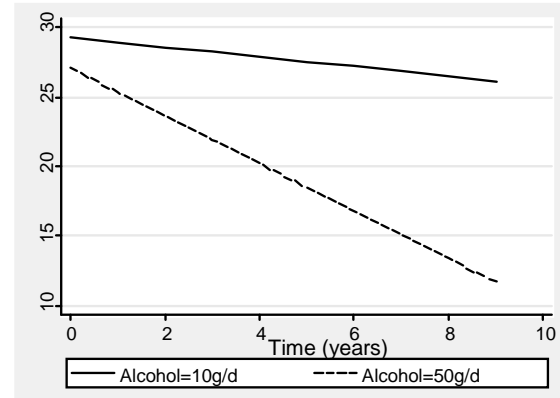

$\gamma_{03} < 0$ ;  $p = 0.52$   
 $\gamma_{13} < 0$ ;  $p = 0.25$



## 2H. TRAILS B, time (sec)

Baseline age=50y

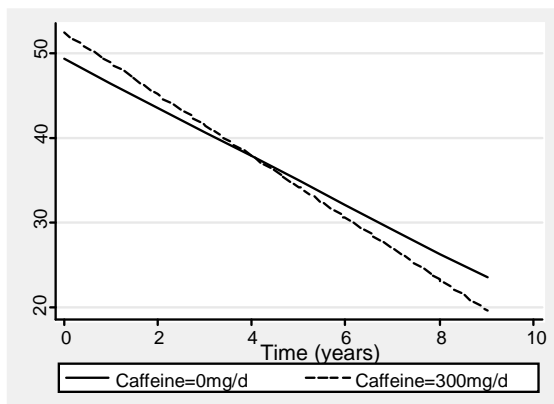

$\gamma_{00} > 0$ ;  $p < 0.001$   
 $\gamma_{10} < 0$ ;  $p = 0.44$   
**Age > 0**;  $p = 0.023$   
 Age  $\times$  Time > 0;  $p = 0.25$   
 $\gamma_{01} > 0$ ;  $p = 0.37$   
 $\gamma_{11} < 0$ ;  $p = 0.42$

Baseline age=70y

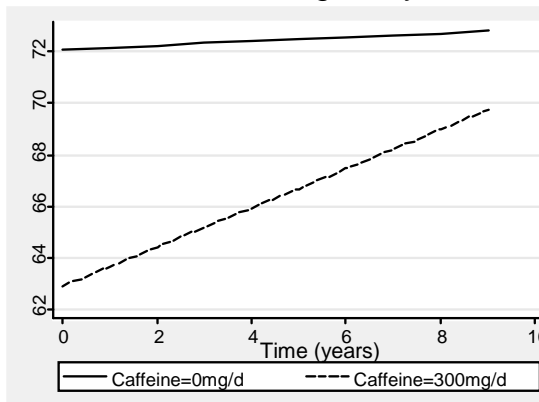

$\gamma_{00} < 0$ ;  $= 0.93$   
 $\gamma_{10} < 0$ ;  $p = 0.76$   
**Age > 0**;  $p < 0.001$   
 Age  $\times$  Time > 0;  $p = 0.48$   
 $\gamma_{01} < 0$ ;  $p = 0.19$   
 $\gamma_{11} > 0.23$ ;  $p = 0.60$

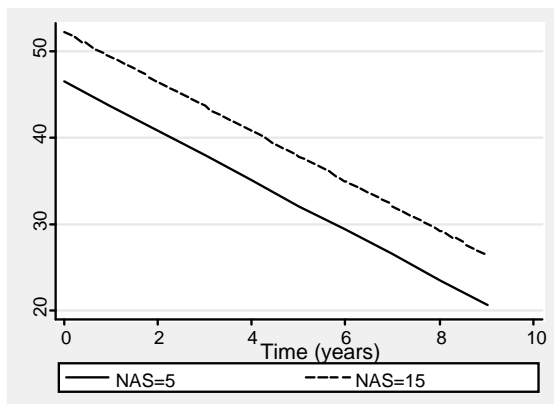

$\gamma_{02} > 0$ ;  $p = 0.41$   
 $\gamma_{12} < 0$ ;  $p = 1.00$

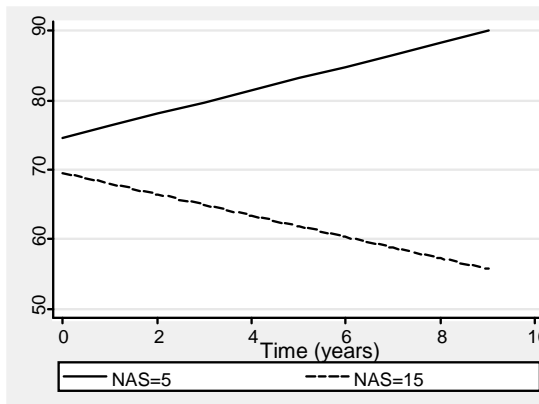

$\gamma_{02} < 0$ ;  $p = 0.66$   
 $\gamma_{12} < 0$ ;  $p = 0.11$

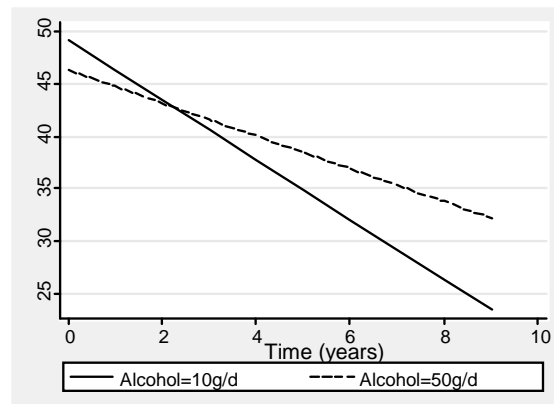

$\gamma_{03} < 0$ ;  $p = 0.60$   
 $\gamma_{13} > 0$ ;  $p = 0.35$

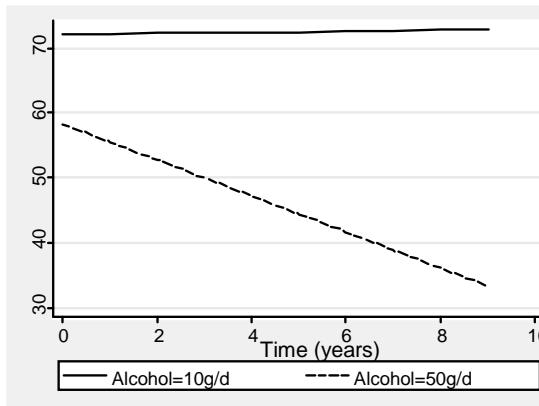

$\gamma_{03} < 0$ ;  $p = 0.20$   
 $\gamma_{13} < 0$ ;  $p = 0.17$

## 2I. DS-F, total score

Baseline age=50y

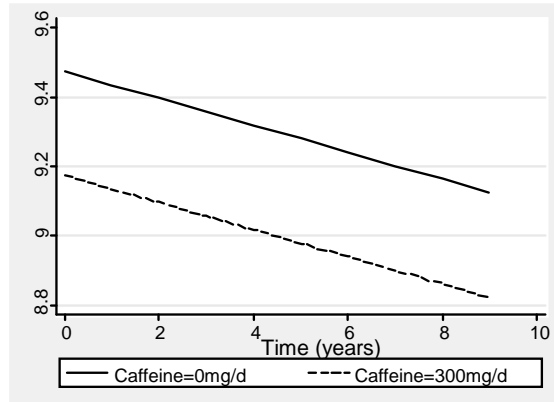

$\gamma_{00} > 0$ ;  $p < 0.001$   
 $\gamma_{10} < 0$ ;  $p = 0.83$   
 $\text{Age} < 0$ ;  $p = 0.18$   
 $\text{Age} \times \text{Time} < 0$ ;  $p = 0.71$   
 $\gamma_{01} < 0$ ;  $p = 0.99$   
 $\gamma_{11} < 0$ ;  $p = 0.99$

Baseline age=70y

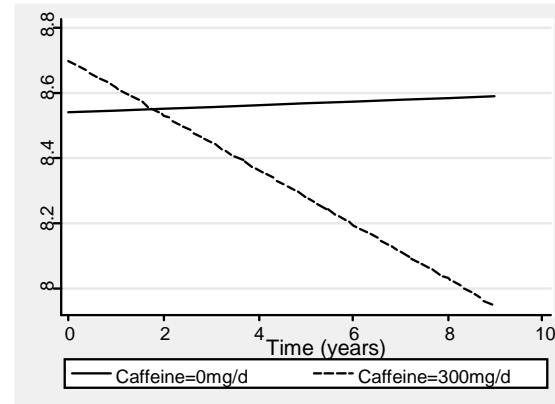

$\gamma_{00} > 0$ ;  $p < 0.001$   
 $\gamma_{10} < 0$ ;  $p = 0.48$   
 $\text{Age} < 0$ ;  $p = 0.008$   
 $\text{Age} \times \text{Time} > 0$ ;  $p = 0.37$   
 $\gamma_{01} > 0$ ;  $p = 0.37$   
 $\gamma_{11} > 0$ ;  $p = 0.60$

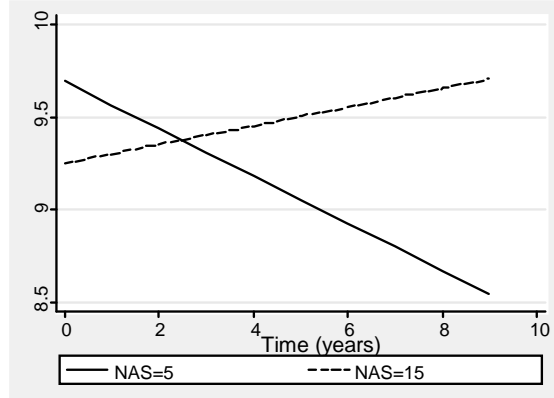

$\gamma_{02} < 0$ ;  $p = 0.36$   
 $\gamma_{12} > 0$ ;  $p = 0.040$

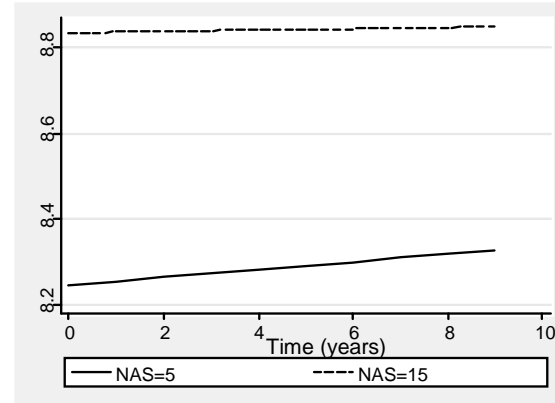

$\gamma_{02} > 0$ ;  $p = 0.60$   
 $\gamma_{12} < 0$ ;  $p = 0.06$

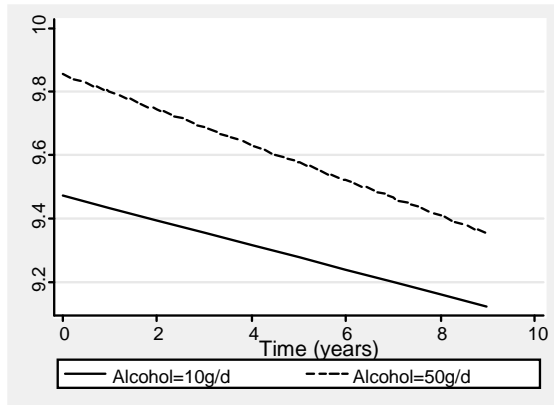

$\gamma_{03} > 0$ ;  $p = 0.29$   
 $\gamma_{13} > 0$ ;  $p = 0.69$

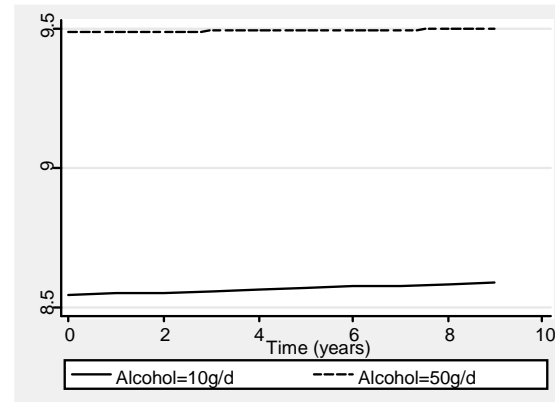

$\gamma_{03} > 0$ ;  $p = 0.045$   
 $\gamma_{13} < 0$ ;  $p = 0.96$

## 2J. DS-B, total score

Baseline age=50y

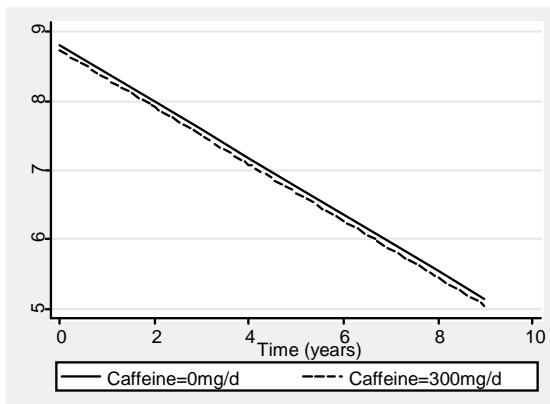

$\gamma_{00} > 0$ ;  $p < 0.001$   
 $\gamma_{10} < 0$ ;  $p = 0.001$   
 $\text{Age} < 0$ ;  $p = 0.068$   
 $\text{Age} \times \text{Time} > 0$ ;  $p = 0.018$   
 $\gamma_{01} < 0$ ;  $p = 0.76$   
 $\gamma_{11} < 0$ ;  $p = 0.98$

Baseline age=70y

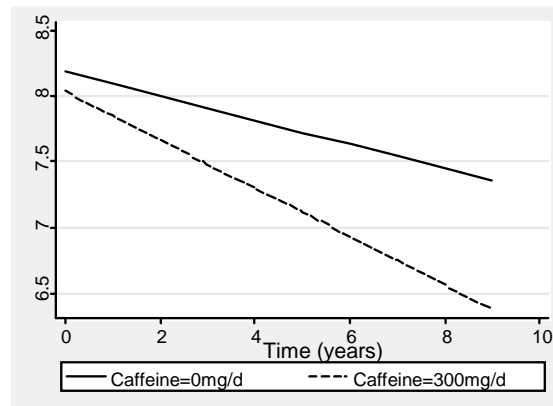

$\gamma_{00} > 0$ ;  $p < 0.001$   
 $\gamma_{10} < 0$ ;  $p = 0.444$   
 $\text{Age} < 0$ ;  $p = 0.037$   
 $\text{Age} \times \text{Time} > 0$ ;  $p = 0.85$   
 $\gamma_{01} < 0$ ;  $p = 0.63$   
 $\gamma_{11} < 0$ ;  $p = 0.30$

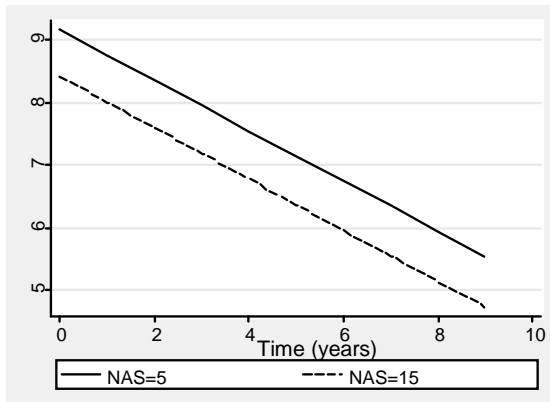

$\gamma_{02} < 0$ ;  $p = 0.14$   
 $\gamma_{12} < 0$ ;  $p = 0.96$

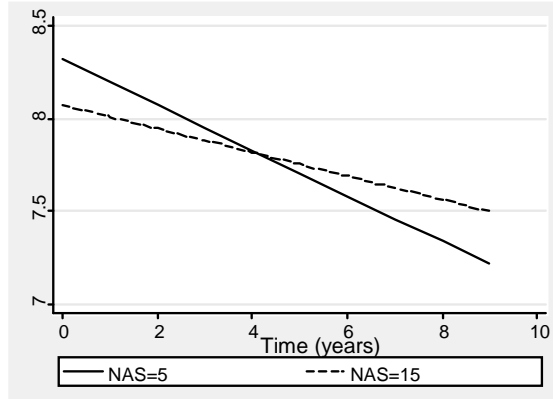

$\gamma_{02} < 0$ ;  $p = 0.66$   
 $\gamma_{12} > 0$ ;  $p = 0.70$

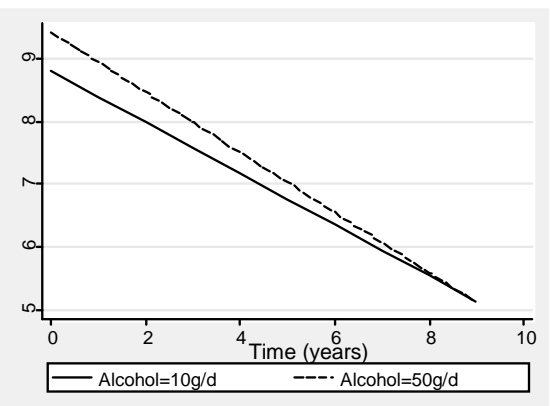

$\gamma_{03} > 0$ ;  $p = 0.11$   
 $\gamma_{13} < 0$ ;  $p = 0.30$

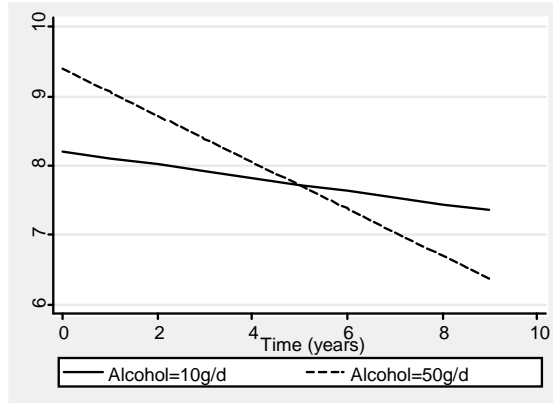

$\gamma_{03} > 0$ ;  $p = 0.015$   
 $\gamma_{13} < 0$ ;  $p = 0.12$

Abbreviations: BVRT=Benton Visual Retention Test; CVLT=California Verbal Learning Test; DS-B=Digits Span-Backwards; DS-F=Digits Span-Forward; MMSE=Mini-Mental State Examination; NAS=Nutrient Adequacy Score; Trails A=Trailmaking test, part A; Trails B=Trailmaking test, part B; VFT-C=Category fluency part of the verbal fluency test; VFT-L=Letter fluency part of the verbal fluency test.

Effect of caffeine is shown for participants aged either 50y or 70y at baseline (from stratified models <70y and ≥70y(See Table 2)). The effect is in a hypothetical population (50% men, 50% women), NH whites, mean education years=16y, baseline year=2000, non-smokers, mean BMI=25, baseline caloric consumption=2000 kcal/d, baseline NAS=10, baseline alcohol intake=10g/d.

Effect of NAS is shown for participants aged either 50y or 70y at baseline (from stratified models <70y and ≥70y(See Table 2)). The effect is in a hypothetical population (50% men, 50% women), NH whites, mean education years=16y, baseline year=2000, non-smokers, mean BMI=25, baseline caloric consumption=2000 kcal/d, baseline caffeine =0 mg/d, baseline alcohol intake=10g/d.

Effect of alcohol is shown for participants aged either 50y or 70y at baseline (from stratified models <70y and ≥70y(See Table 2)). The effect is in a hypothetical population (50% men, 50% women), NH whites, mean education years=16y, baseline year=2000, non-smokers, mean BMI=25, baseline caloric consumption=2000 kcal/d, baseline caffeine =0 mg/d, baseline NAS=10.
